# Supplementary material
Source: publisher figshare collection journal article supplement (https://gsapubs.figshare.com/ndownloader/files/30991291)
Supplement: Supplementary file 1 [file 30991291]

## Sheet: Sheet1
Experiment run time (hour)	Normalized experiment time (T*)
0.1	888
0.766667	7650
1.58333	15167
2.85	24766
3.65	31383
4.15	35338
4.76667	39424
5.43333	42419
6.03333	44785
7	48541
7.7	51826
8.76667	57146
9.53333	61142
10.0833	63697
10.9833	66402

## Sheet: G49286
Sun, Z., et al., 2021, Formation of low-gradient bedrock chutes by dry rockfall on planetary surfaces: Geology, https://doi.org/10.1130/G49286.1
